# Supplementary material for: Targeted genotyping of circulating tumor DNA for classical Hodgkin lymphoma monitoring: a prospective study
Source: PubMed Central journal article supplement — Haematologica. 2020 Feb 20;106(1):154–62. doi: 10.3324/haematol.2019.237719 (PMC7776248; doi:10.3324/haematol.2019.237719), 2020-02-20

## Targeted genotyping of circulating tumor DNA for classical Hodgkin lymphoma monitoring: a prospective study

Vincent Camus,<sup>1,2</sup> Mathieu Viennot,<sup>2</sup> Justine Lequesne,<sup>3</sup> Pierre-Julien Viailly,<sup>2</sup> Elodie Bohers,<sup>2</sup> Lucile Bessi,<sup>2</sup> Bénédicte Marcq,<sup>1,2</sup> Pascaline Etancelin,<sup>2,4</sup> Sydney Dubois,<sup>1,2</sup> Jean Michel Picquenot,<sup>2,5</sup> Elena-Liana Veresezan,<sup>2,5</sup> Marie Cornic,<sup>3</sup> Lucie Burel,<sup>3</sup> Justine Loret,<sup>3</sup> Stéphanie Becker,<sup>6</sup> Pierre Decazes,<sup>6</sup> Pascal Lenain,<sup>1</sup> Stéphane Lepretre,<sup>1,2</sup> Emilie Lemasle,<sup>1</sup> Hélène Lanic,<sup>1</sup> Anne-Lise Ménard,<sup>1</sup> Nathalie Contentin,<sup>1</sup> Hervé Tilly,<sup>1,2</sup> Aspasia Stamatoullas<sup>1,2</sup> and Fabrice Jardin<sup>1,2</sup>

<sup>1</sup>Department of Hematology, Center Henri Becquerel; <sup>2</sup>University of Rouen, INSERM U1245, Center Henri Becquerel; <sup>3</sup>Clinical Research Unit, Centre Henri Becquerel; <sup>4</sup>Department of Genetic Oncology, Center Henri Becquerel; <sup>5</sup>Department of Pathology, Center Henri Becquerel and <sup>6</sup>Department of Nuclear Medicine and Radiology, Center Henri Becquerel and QuantIF (Litis EA4108 – FR CNRS 3638), Rouen, France

©2021 Ferrata Storti Foundation. This is an open-access paper. doi:10.3324/haematol.2019.237719

Received: October 16, 2019.

Accepted: February 12, 2020.

Pre-published: February 20, 2020.

Correspondence: *VINCENT CAMUS* - [vincent.camus@chb.unicancer.fr](mailto:vincent.camus@chb.unicancer.fr)

---

## **Supplemental data**

### **Supplementary methods:**

#### **Patients**

A universal patient identification number (UPN) was created for each patient to describe results.

#### **DNA extraction**

Circulating cell-free DNA (cfDNA) was extracted from 3mL of plasma aliquots with Amp Circulating Nucleic Acid® QI Kit (Qiagen, Hilden, Germany) according to the manufacturer's instructions. The DNA was eluted in 60 to 80 µL of AVE buffer then stored at -80 ° C. Quantification of the double-stranded DNA was performed by fluorometry on Qubit 2.0 (Thermo Fisher Scientific Carlsbad, CA, USA), with Qubit® dsDNA kit HS Assay (Thermo Fisher Scientific, Carlsbad, CA, USA). DNA extraction from FFPE (formalin fixed paraffin embedded) biopsies was performed using the Maxwell® 16 (Promega, Madison, USA) and the Maxwell 16 FFPE Plus LEV DNA Purification® (Promega, Madison, USA) kits. The genomic DNA (gDNA) thus extracted was "repaired" by NEB Next FFPE DNA Repair Mix® (New England Biolab, Ipswich, USA) before being quantified by fluorimetry and stored at -20 ° C.

#### **Chemotherapy regimens and radiotherapy**

Patients with favorable localized stage I-II disease received 2 cycles of ABVD (doxorubicin, bleomycin, vinblastin, dacarbazine) followed by 20-Gray involved-field radiotherapy (IFRT); unfavorable localized stage I-II received 4 cycles of ABVD followed by 30-Gray IFRT<sup>10,11</sup>. Advanced stage disease patients < 60 year old received a treatment strategy driven by PET (according to AHL2011 trial results<sup>12</sup>) : all patients received two cycles of upfront BEACOPPescalated (Increased-dose bleomycin, etoposide, doxorubicin, cyclophosphamide,

vincristine, procarbazine, and prednisone), after which PET assessment was performed (PET2). Patients with a positive PET2 scan received the further four cycles of BEACOPPescalated and those with a negative PET2 scan switched to four cycles of ABVD for the remaining induction therapy. In both treatment groups, PET after four cycles of chemotherapy was used to decide whether to continue with the same treatment in those with negative PET (either two cycles of ABVD or two cycles of BEACOPPescalated) or start salvage therapy in patients with positive PET. Regarding elderly (>60 years old) advanced stage patients : they received 6-8 cycles of ABVD with or without bleomycin<sup>13</sup> or another conventional chemotherapy (procarbazine and vinblastine-based regimen) or inclusion in a therapeutic clinical trial according to the physician's decision.

### **Positron emission tomography (PET) evaluation**

PET evaluation at diagnosis and during treatment was performed according to routine local recommendations for the management of patients with a diagnosis of *de novo* cHL. The response to treatment was evaluated with <sup>18</sup>F-fluorodeoxyglucose (FDG) PET by visually comparing the metabolic uptake of the area involved in diagnosis versus metabolic uptake of the mediastinum and of the liver, considered as reference organs according to the Deauville score<sup>12</sup>. Two independent readings by two different nuclear medicine physicians were performed. Metabolic response was also assessed according to the Lugano criteria. Complete metabolic response was defined as negative FDG PET (Deauville score at 1, 2 or 3) with or without a non-fixing residual mass. Partial metabolic response was defined as FDG PET with Deauville score at 4 or 5 with reduction of intensity uptake compared to the examination carried out at the diagnosis whatever the size of the residual mass, without appearance of new lesions. Metabolic non response was defined by a Deauville score at 4 or 5 without significant change in FDG uptake compared to the diagnostic examination performed without appearance of new lesions. Metabolic progression was defined as a score of 4 or 5 with increased FDG

uptake (SUV) of a hypermetabolic lesion compared to the examination performed at diagnosis or by the appearance of a new FDG-hypermetabolic focus compatible with a lymphoma.

### **Next-Generation Sequencing**

Next-generation sequencing of targeted genes was performed on Ion Torrent Personal Genome Machine™ (PGM, Thermo Fisher Scientific). The first step is the preparation of the libraries: a multiplex PCR is performed with primers specifically chosen to target the 4 base pair hotspot deletion in gene exon 1 *NFKBIE*, the coding regions of the genes *ITPKB* (exons 2 to 8), *PTPNI* (exons 1 to 10), *TNFAIP3* (exons 2 to 9), *SOCS1* (exon 2), exons 12 and 14 of the *STAT6* gene, exons 1 to 3 of the *B2M* gene, exons 15 to 18 of the *XPO1* gene, and exons 1 to 4 of the *GNAI3* gene (See **Supplementary Table 1** for details of amplicons). The design of the PCR primers was performed using the AmpliSeq™ Designer tool (Thermo Fisher Scientific). 169 primer pairs were divided into 3 pools. This panel covers 12.36 kb of the genome. The minimum and maximum sizes of the amplicons are respectively 125 and 175pb. Adapters, nucleotide sequences involved in the clonal amplification and sequencing steps, are then ligated to the amplicons. The second step is an emulsion PCR, which clonally amplifies each fragment of the library. This is performed in microreactors (lipid droplets) containing the elements necessary for the PCR (library, nucleotides, polymerase) and 20µM spheres called ISP (Ion Sphere Particles), lined with PCR primers complementary to one of the adapters. This step requires precise dosing of the library so as to obtain equimolarity between fragments of the library and microreactors. At the end of the PCR, the ISPs are lined with amplified nucleotide sequences. Several configurations of microreactors can be created. Only the monoclonality configuration (1 sphere, 1 DNA fragment) is desired. The enrichment step then makes it possible to eliminate the ISPs without amplicon, but not the bi or poly clonal ISPs, and to prepare the sequencing matrix that will be loaded on the sequencing chip. The clonal

PCR steps, enrichment and loading of the sequencing chips (deposit of an ISP in a well of a chip), are carried out by the Ion Chef™ System with the PGM Ion Hi-Q View Chef™ kit. Sequencing is addition sequencing: the incorporation of a nucleotide complementary to the nucleotide to be identified is associated with the release of a proton, resulting in a pH variation detected by a semiconductor located at the bottom of each well. For all samples (DNA extracted from biopsy or plasma DNA), 3 PCRs were performed, one per primer pool, with a total amount of 100ng DNA for the DNA samples extracted from biopsy and 6µL of PCR test sample for plasma DNA samples (total variable DNA due to different initial concentrations). The products of the 3 PCRs were then pooled, before ligation of the adapters. 22 PCR cycles were performed. For all samples, the library concentration was standardized with the Ion Library Equalizer kit (Thermo Fisher Scientific) according to the manufacturer's recommendations. 8 samples were sequenced per chip (Ion 318™ v2 Chip, Life Technologies, Waltham, MA). Bioinformatic analysis of the data was performed by software builders for base-calling (Variant Caller), alignment and quality control (Torrent Suite, Coverage Analysis). According to pathologists, the average percentage of tumor cells in cHL is 3%. Based on a theoretical sensitivity of 1%, and on a minimum number of mutated reads equal to 50, the minimum depth of desired sequencing was set at 5000X. Annotation of variants was created after aggregation of information from the RefSeq gene, RefSeq mRNA, 1000 genomes, ExAc, cg40, ESP, COSMIC (v64), dbSNP, and ClinVar. Variants with depth <100x or with number of mutated reads <6 were eliminated. Variants related to residual technical artifacts were filtered, as well as those with negative SIFT and CADD scores. All variant with > 1% minor allele frequency (MAF) in these databases are considered as SNPs and were not considered as somatic variant. Constitutional SNPs may be present in the plasma of patients with 50% or 100% VAF, but we did not consider them as to be positive results in our somatic mutations detection process. We had access to peripheral blood mononuclear

cells (PBMC) germline DNA for each patient in case of any ambiguities for variant classification after consulting the reference databases. Regarding technical detection limits, taking into account previous experiences in our laboratory, we considered a lower limit of detection of 0.5% VAF making it possible to eliminate more than 95% of the low frequency variants probably corresponding to background noise. For ctDNA analysis after two cycles of chemotherapy, we performed a blind search for new variants and a manual check of all mutations that were present at diagnosis on Integrative Genomics Viewer (IGV). Samples at diagnostic and after C2 were all treated in the same way. The desired depth was the same as for the diagnostic sample.

### **Statistical analysis**

The characteristics of the sample were described using numbers and percentages for qualitative variables, and by mean, median, standard deviation and extreme values for quantitative variables. Comparison of characteristics according to the mutational profile of patients was established by a Chi<sup>2</sup> test (or Fisher's exact test) for qualitative variables, and a non-parametric Wilcoxon Mann Whitney test for quantitative variables. Plasma DNA concentrations at diagnosis and median VAFs of plasma variants at diagnosis were compared according to different clinical and biological characteristics by the Wilcoxon Mann Whitney test. Their correlation with continuous variables was measured by the Pearson and Spearman coefficients, so as to highlight first a possible linear relationship, then monotonous otherwise. Overall survival (OS) in months was calculated from the date of diagnosis to the date of death from any cause or the date of last follow-up while alive. Progression-free survival (PFS) in months was calculated from the date of diagnosis until disease progression, relapse or death from any cause or the last patient follow-up. Estimates of survival were calculated using the Kaplan-Meier method. The median VAF comparison of the variants detected in the biopsy and matched plasma were

evaluated by the non-parametric Wilcoxon signed-rank test. The level of significance retained for each test is 5%. Statistics were performed with R software v3.3.2.

**Supplementary Table 1 : Chromosomal localization of Hodgkin-Panel amplicons**

| <b>Chromosome</b> | <b>gene</b>  | <b>Start region</b> | <b>Stop region</b> |
|-------------------|--------------|---------------------|--------------------|
| chr1              | <i>ITPKB</i> | 226822316           | 226822405          |
| chr1              | <i>ITPKB</i> | 226822405           | 226822505          |
| chr1              | <i>ITPKB</i> | 226822491           | 226822602          |
| chr1              | <i>ITPKB</i> | 226822585           | 226822688          |
| chr1              | <i>ITPKB</i> | 226825374           | 226825456          |
| chr1              | <i>ITPKB</i> | 226827245           | 226827341          |
| chr1              | <i>ITPKB</i> | 226827330           | 226827412          |
| chr1              | <i>ITPKB</i> | 226829536           | 226829625          |
| chr1              | <i>ITPKB</i> | 226829544           | 226829677          |
| chr1              | <i>ITPKB</i> | 226829643           | 226829739          |
| chr1              | <i>ITPKB</i> | 226829729           | 226829826          |
| chr1              | <i>ITPKB</i> | 226829785           | 226829872          |
| chr1              | <i>ITPKB</i> | 226834784           | 226834884          |
| chr1              | <i>ITPKB</i> | 226834878           | 226834977          |
| chr1              | <i>ITPKB</i> | 226834939           | 226835026          |
| chr1              | <i>ITPKB</i> | 226834997           | 226835087          |
| chr1              | <i>ITPKB</i> | 226836367           | 226836447          |
| chr1              | <i>ITPKB</i> | 226836427           | 226836498          |
| chr1              | <i>ITPKB</i> | 226923200           | 226923294          |
| chr1              | <i>ITPKB</i> | 226923263           | 226923358          |
| chr1              | <i>ITPKB</i> | 226923344           | 226923436          |
| chr1              | <i>ITPKB</i> | 226923379           | 226923477          |
| chr1              | <i>ITPKB</i> | 226923441           | 226923538          |
| chr1              | <i>ITPKB</i> | 226923501           | 226923600          |
| chr1              | <i>ITPKB</i> | 226923546           | 226923633          |
| chr1              | <i>ITPKB</i> | 226923622           | 226923723          |
| chr1              | <i>ITPKB</i> | 226923716           | 226923818          |
| chr1              | <i>ITPKB</i> | 226923738           | 226923837          |
| chr1              | <i>ITPKB</i> | 226923838           | 226923938          |
| chr1              | <i>ITPKB</i> | 22692<br>52         | 226923957          |
| chr1              | <i>ITPKB</i> | 226923992           | 226924092          |
| chr1              | <i>ITPKB</i> | 226923999           | 226924100          |
| chr1              | <i>ITPKB</i> | 226924114           | 226924211          |
| chr1              | <i>ITPKB</i> | 226924169           | 226924279          |

|       |              |           |           |
|-------|--------------|-----------|-----------|
| chr1  | <i>ITPKB</i> | 226924278 | 226924367 |
| chr1  | <i>ITPKB</i> | 226924356 | 226924446 |
| chr1  | <i>ITPKB</i> | 226924434 | 226924522 |
| chr1  | <i>ITPKB</i> | 226924515 | 226924603 |
| chr1  | <i>ITPKB</i> | 226924601 | 226924697 |
| chr1  | <i>ITPKB</i> | 226924623 | 226924726 |
| chr1  | <i>ITPKB</i> | 226924740 | 226924841 |
| chr1  | <i>ITPKB</i> | 226924754 | 226924858 |
| chr1  | <i>ITPKB</i> | 226924886 | 226925012 |
| chr1  | <i>ITPKB</i> | 226925028 | 226925155 |
| chr12 | <i>STAT6</i> | 57493815  | 57493912  |
| chr12 | <i>STAT6</i> | 57496604  | 57496704  |
| chr15 | <i>B2M</i>   | 45003707  | 45003801  |
| chr15 | <i>B2M</i>   | 45003792  | 45003889  |
| chr15 | <i>B2M</i>   | 45007590  | 45007673  |
| chr15 | <i>B2M</i>   | 45007662  | 45007755  |
| chr15 | <i>B2M</i>   | 45007744  | 45007830  |
| chr15 | <i>B2M</i>   | 45007819  | 45007902  |
| chr15 | <i>B2M</i>   | 45007891  | 45007982  |
| chr15 | <i>B2M</i>   | 45008469  | 45008549  |
| chr16 | <i>SOCS1</i> | 11348660  | 11348754  |
| chr16 | <i>SOCS1</i> | 11348771  | 11348873  |
| chr16 | <i>SOCS1</i> | 11348773  | 11348894  |
| chr16 | <i>SOCS1</i> | 11348888  | 11348973  |
| chr16 | <i>SOCS1</i> | 11348906  | 11348995  |
| chr16 | <i>SOCS1</i> | 11348995  | 11349095  |
| chr16 | <i>SOCS1</i> | 11349015  | 11349152  |
| chr16 | <i>SOCS1</i> | 11349158  | 11349246  |
| chr16 | <i>SOCS1</i> | 11349164  | 11349297  |
| chr16 | <i>SOCS1</i> | 11349181  | 11349283  |
| chr16 | <i>SOCS1</i> | 11349301  | 11349392  |
| chr17 | <i>GNA13</i> | 63010304  | 63010390  |
| chr17 | <i>GNA13</i> | 63010380  | 63010466  |
| chr17 | <i>GNA13</i> | 63010452  | 63010539  |
| chr17 | <i>GNA13</i> | 63010528  | 63010618  |
| chr17 | <i>GNA13</i> | 63010609  | 63010678  |
| chr17 | <i>GNA13</i> | 63010667  | 63010748  |
| chr17 | <i>GNA13</i> | 63010737  | 63010829  |
| chr17 | <i>GNA13</i> | 63010818  | 63010907  |
| chr17 | <i>GNA13</i> | 63010898  | 63010968  |
| chr17 | <i>GNA13</i> | 63014328  | 63014410  |
| chr17 | <i>GNA13</i> | 63014399  | 63014473  |
| chr17 | <i>GNA13</i> | 63049550  | 63049641  |
| chr17 | <i>GNA13</i> | 63049630  | 63049699  |
| chr17 | <i>GNA13</i> | 63049687  | 63049758  |



|       |              |          |          |
|-------|--------------|----------|----------|
| chr17 | <i>GNA13</i> | 63049742 | 63049834 |
| chr17 | <i>GNA13</i> | 63049821 | 63049943 |
| chr17 | <i>GNA13</i> | 63049844 | 63049923 |
| chr17 | <i>GNA13</i> | 63052337 | 63052437 |
| chr17 | <i>GNA13</i> | 63052440 | 63052572 |
| chr17 | <i>GNA13</i> | 63052454 | 63052551 |
| chr17 | <i>GNA13</i> | 63052511 | 63052609 |
| chr17 | <i>GNA13</i> | 63052601 | 63052700 |
| chr2  | <i>XPO1</i>  | 61715668 | 61715750 |
| chr2  | <i>XPO1</i>  | 61715739 | 61715827 |
| chr2  | <i>XPO1</i>  | 61715816 | 61715891 |
| chr2  | <i>XPO1</i>  | 61717742 | 61717815 |
| chr2  | <i>XPO1</i>  | 61717804 | 61717886 |
| chr2  | <i>XPO1</i>  | 61717873 | 61717942 |
| chr2  | <i>XPO1</i>  | 61719158 | 61719225 |
| chr2  | <i>XPO1</i>  | 61719210 | 61719279 |
| chr2  | <i>XPO1</i>  | 61719268 | 61719349 |
| chr2  | <i>XPO1</i>  | 61719408 | 61719493 |
| chr2  | <i>XPO1</i>  | 61719475 | 61719556 |
| chr2  | <i>XPO1</i>  | 61719513 | 61719591 |
| chr2  | <i>XPO1</i>  | 61719589 | 61719667 |
| chr20 | <i>PTPN1</i> | 49127098 | 49127198 |
| chr20 | <i>PTPN1</i> | 49177838 | 49177931 |
| chr20 | <i>PTPN1</i> | 49177920 | 49178009 |
| chr20 | <i>PTPN1</i> | 49181498 | 49181586 |
| chr20 | <i>PTPN1</i> | 49181581 | 49181656 |
| chr20 | <i>PTPN1</i> | 49184885 | 49184978 |
| chr20 | <i>PTPN1</i> | 49184959 | 49185036 |
| chr20 | <i>PTPN1</i> | 49191006 | 49191082 |
| chr20 | <i>PTPN1</i> | 49191072 | 49191145 |
| chr20 | <i>PTPN1</i> | 49191103 | 49191196 |
| chr20 | <i>PTPN1</i> | 49194885 | 49194973 |
| chr20 | <i>PTPN1</i> | 49194962 | 49195031 |
| chr20 | <i>PTPN1</i> | 49195028 | 49195123 |
| chr20 | <i>PTPN1</i> | 49195113 | 49195197 |
| chr20 | <i>PTPN1</i> | 49195157 | 49195248 |
| chr20 | <i>PTPN1</i> | 49195664 | 49195745 |
| chr20 | <i>PTPN1</i> | 49195734 | 49195828 |
| chr20 | <i>PTPN1</i> | 49195826 | 49195910 |
| chr20 | <i>PTPN1</i> | 49196218 | 49196313 |
| chr20 | <i>PTPN1</i> | 49196257 | 49196350 |
| chr20 | <i>PTPN1</i> | 49196338 | 49196431 |
| chr20 | <i>PTPN1</i> | 49196383 | 49196468 |
| chr20 | <i>PTPN1</i> | 49197739 | 49197817 |
| chr20 | <i>PTPN1</i> | 49197817 | 49197911 |

|       |                |           |           |
|-------|----------------|-----------|-----------|
| chr20 | <i>PTPN1</i>   | 49197909  | 49198002  |
| chr20 | <i>PTPN1</i>   | 49199140  | 49199240  |
| chr20 | <i>PTPN1</i>   | 49199204  | 49199309  |
| chr6  | <i>NFKBIE</i>  | 44232727  | 44232827  |
| chr6  | <i>TNFAIP3</i> | 138192300 | 138192387 |
| chr6  | <i>TNFAIP3</i> | 138192376 | 138192464 |
| chr6  | <i>TNFAIP3</i> | 138192453 | 138192529 |
| chr6  | <i>TNFAIP3</i> | 138192518 | 138192595 |
| chr6  | <i>TNFAIP3</i> | 138192584 | 138192671 |
| chr6  | <i>TNFAIP3</i> | 138195940 | 138196035 |
| chr6  | <i>TNFAIP3</i> | 138196024 | 138196112 |
| chr6  | <i>TNFAIP3</i> | 138196101 | 138196184 |
| chr6  | <i>TNFAIP3</i> | 138196778 | 138196855 |
| chr6  | <i>TNFAIP3</i> | 138196844 | 138196915 |
| chr6  | <i>TNFAIP3</i> | 138196904 | 138196982 |
| chr6  | <i>TNFAIP3</i> | 138197108 | 138197187 |
| chr6  | <i>TNFAIP3</i> | 138197172 | 138197265 |
| chr6  | <i>TNFAIP3</i> | 138197258 | 138197334 |
| chr6  | <i>TNFAIP3</i> | 138198185 | 138198266 |
| chr6  | <i>TNFAIP3</i> | 138198244 | 138198315 |
| chr6  | <i>TNFAIP3</i> | 138198305 | 138198389 |
| chr6  | <i>TNFAIP3</i> | 138198379 | 138198470 |
| chr6  | <i>TNFAIP3</i> | 138199540 | 138199618 |
| chr6  | <i>TNFAIP3</i> | 138199607 | 138199689 |
| chr6  | <i>TNFAIP3</i> | 138199645 | 138199736 |
| chr6  | <i>TNFAIP3</i> | 138199736 | 138199821 |
| chr6  | <i>TNFAIP3</i> | 138199810 | 138199907 |
| chr6  | <i>TNFAIP3</i> | 138199918 | 138200005 |
| chr6  | <i>TNFAIP3</i> | 138199936 | 138200031 |
| chr6  | <i>TNFAIP3</i> | 138200012 | 138200111 |
| chr6  | <i>TNFAIP3</i> | 138200081 | 138200171 |
| chr6  | <i>TNFAIP3</i> | 138200168 | 138200266 |
| chr6  | <i>TNFAIP3</i> | 138200269 | 138200357 |
| chr6  | <i>TNFAIP3</i> | 138200332 | 138200414 |
| chr6  | <i>TNFAIP3</i> | 138200372 | 138200461 |
| chr6  | <i>TNFAIP3</i> | 138200450 | 138200536 |
| chr6  | <i>TNFAIP3</i> | 138201146 | 138201226 |
| chr6  | <i>TNFAIP3</i> | 138201215 | 138201294 |
| chr6  | <i>TNFAIP3</i> | 138201267 | 138201345 |
| chr6  | <i>TNFAIP3</i> | 138201332 | 138201422 |
| chr6  | <i>TNFAIP3</i> | 138202114 | 138202204 |
| chr6  | <i>TNFAIP3</i> | 138202193 | 138202293 |
| chr6  | <i>TNFAIP3</i> | 138202293 | 138202380 |
| chr6  | <i>TNFAIP3</i> | 138202307 | 138202402 |
| chr6  | <i>TNFAIP3</i> | 138202401 | 138202494 |



**Supplementary Table 2 :** Somatic variants detected by high throughput DNA sequencing of biopsy (gDNA) and plasma (ctDNA) samples at diagnosis (baseline) and after 2 cycles of chemotherapy (C2). The coverage (sequencing depth) is expressed in number (n) of reads analyzed.

| Universal Patient identification number (UPN) | Somatic mutation |          | Genomic DNA (biopsy) |                       | ctDNA (plasma) |                       |                      |                                            |
|-----------------------------------------------|------------------|----------|----------------------|-----------------------|----------------|-----------------------|----------------------|--------------------------------------------|
|                                               | Gene             | variant  | VAF (%)              | concentration (ng/mL) | VAF (%)        | Coverage baseline (n) | Coverage Post C2 (n) | haploid genome equivalents per ml (hGE/ml) |
| UPN1                                          | <i>SOCS1</i>     | P.Y203S  | 0.56                 | 15                    | 0.62           | 4509                  | 6126                 | 37.63                                      |
| UPN2                                          | <i>B2M</i>       | p.M1K    | 1.68                 | 11.2                  | 1.14           | 3519                  | 3061                 | 58.37                                      |
|                                               | <i>NFKBIE</i>    | p.Y254FS | 2.24                 |                       | 0.94           | 4946                  | 3565                 |                                            |
|                                               | <i>SOCS1</i>     | p.R69FS  | 3.06                 |                       | 0.77           | 2178                  | 836                  |                                            |
|                                               | <i>B2M</i>       | p.L10FS  | 1.4                  |                       | undetectable   | undetectable          | undetectable         |                                            |
| UPN3                                          | <i>B2M</i>       | UTR5     | 1.13                 | 14.6                  | 8.6            | 3589                  | 2785                 | 1677.88                                    |
|                                               | <i>NFKBIE</i>    | P.Y254FS | 4.63                 |                       | 21.4           | 3632                  | 2872                 |                                            |
|                                               | <i>STAT6</i>     | P.N417S  | 1.34                 |                       | 12.4           | 5375                  | 3948                 |                                            |
|                                               | <i>ITPKB</i>     | P.A290G  | 1.9                  |                       | 14.9           | 6748                  | 5707                 |                                            |
| UPN4                                          | <i>ITPKB</i>     | P.G260R  | 2.51                 | 8.9                   | undetectable   | undetectable          | undetectable         | 35.18                                      |
|                                               | <i>STAT6</i>     | P.N421K  | 1.47                 |                       | undetectable   | undetectable          | undetectable         |                                            |
|                                               | <i>B2M</i>       | P.C100X  | 2.06                 |                       | 0.6            | 4173                  | 4637                 |                                            |

|      |                |              |              |      |              |              |              |        |
|------|----------------|--------------|--------------|------|--------------|--------------|--------------|--------|
|      | <i>SOCS1</i>   | P.F79I       | 2.63         |      | undetectable | undetectable | undetectable |        |
|      | <i>XPO1</i>    | P.E571K      | 1.23         |      | 0.8          | 4998         | 3643         |        |
|      | <i>ITPKB</i>   | P.R331P      | 1.42         |      | undetectable | undetectable | undetectable |        |
|      | <i>ITPKB</i>   | P.A298P      | 1.33         |      | undetectable | undetectable | undetectable |        |
|      | <i>ITPKB</i>   | P.L8V        | 1.43         |      | undetectable | undetectable | undetectable |        |
|      | <i>SOCS1</i>   | P.L166Q      | 1.6          |      | 0.52         | 4635         | 5332         |        |
|      | <i>SOCS1</i>   | P.P123A      | 1.37         |      | undetectable | undetectable | undetectable |        |
|      |                |              |              |      |              |              |              |        |
|      |                |              |              |      |              |              |              |        |
|      |                |              |              |      |              |              |              |        |
|      | <i>SOCS1</i>   | p.G122fs     | undetectable |      | 1.9          | 9604         | 9358         |        |
| UPN5 | <i>NFKBIE</i>  | P.Y254FS     | 2.77         | 10.8 | 0.6          | 4759         | 4912         | 39.11  |
|      | <i>SOCS1</i>   | P.P165FS     | 2.4          |      | undetectable | undetectable | undetectable |        |
|      | <i>B2M</i>     | P.L10F       | undetectable |      | 0.52         | 3089         | 3593         |        |
|      | <i>ITPKB</i>   | P.P37L       | undetectable |      | 0.74         | 2307         | 2352         |        |
|      | <i>ITPKB</i>   | P.P36S       | undetectable |      | 0.95         | 2267         | 2351         |        |
|      | <i>B2M</i>     | p.Q22X       | 0.56         |      | undetectable | undetectable | undetectable |        |
| UPN6 | no variant     |              | no variant   | 4.5  | no variant   | no variant   | no variant   | 0      |
| UPN7 | <i>TNFAIP3</i> | P.E132X      | 1.89         | 18.9 | 10.1         | 4358         | 4435         | 531.34 |
|      | <i>SOCS1</i>   | P.R169S      | 4.34         |      | 23.25        | 4196         | 4321         |        |
|      | <i>SOCS1</i>   | P.160_167DEL | 3.25         |      | 17.16        | 3637         | 4354         |        |
|      | <i>SOCS1</i>   | P.138_143DEL | undetectable |      | 0.66         | 7739         | 8167         |        |
| UPN8 | <i>XPO1</i>    | P.E571G      | 1.6          | 16.3 | 11.6         | 3288         | 3792         | 651.67 |
|      | <i>SOCS1</i>   | P.P165FS     | 2.09         |      | 9.9          | 2587         | 5880         |        |
|      | <i>ITPKB</i>   | P.C5FS       | 2.9          |      | 5.5          | 1750         | 3165         |        |
|      | <i>ITPKB</i>   | P.S16R       | 2.77         |      | 5.4          | 1747         | 3183         |        |
|      | <i>ITPKB</i>   | P.S410N      | 3.62         |      | 12.9         | 8237         | 14053        |        |
|      | <i>TNFAIP3</i> | P.G440X      | 0.86         |      | 4.2          | 5174         | 5443         |        |
|      | <i>TNFAIP3</i> | P.L227FS     | 0.96         |      | 8.8          | 4324         | 5120         |        |

|       |                |          |              |      |              |              |                   |         |
|-------|----------------|----------|--------------|------|--------------|--------------|-------------------|---------|
|       | <i>ITPKB</i>   | P.A272T  | 2.15         |      | 7.87         | 4334         | 6821              |         |
| UPN9  | <i>SOCS1</i>   | P.H54FS  | 0.73         | 12.9 | 1.9          | 1022         | 2014              | 64.56   |
|       | <i>NFKBIE</i>  | P.Y254FS | undetectable |      | 0.84         | 4257         | 4650              |         |
| UPN10 | <i>B2M</i>     | P.M1T    | 2.35         | 4.2  | 2.4          | 3587         | loss of follow-up | 944.16  |
|       | <i>STAT6</i>   | P.D519N  | 2.43         |      | 4.3          | 3406         | loss of follow-up |         |
|       | <i>STAT6</i>   | P.N417Y  | 1.92         |      | 5.1          | 6442         | loss of follow-up |         |
|       | <i>TNFAIP3</i> | P.C627FS | 2.16         |      | 4.75         | 8160         | loss of follow-up |         |
|       | <i>TNFAIP3</i> | P.R410FS | 2.37         |      | 4.7          | 3948         | loss of follow-up |         |
|       | <i>ITPKB</i>   | P.M257FS | 1.63         |      | 9.2          | 109          | loss of follow-up |         |
|       | <i>SOCS1</i>   | P.S116R  | 2.76         |      | 2.2          | 4092         | loss of follow-up |         |
| UPN11 | no variant     |          | no variant   | 12.9 | no variant   | no variant   | no variant        | 0       |
| UPN12 | <i>STAT6</i>   | P.N417Y  | 3.14         | 6.2  | 1.92         | 5414         | 4115              | 39.48   |
|       | <i>TNFAIP3</i> | P.E297X  | 1.6          |      | 0.53         | 3936         | 3395              |         |
|       | <i>B2M</i>     | P.L13R   | 3.04         |      | undetectable | undetectable | undetectable      |         |
|       | <i>GNA13</i>   | P.K121X  | 2.2          |      | 0.96         | 2598         | 2790              |         |
|       | <i>SOCS1</i>   | P.H4FS   | 0.54         |      | 0.54         | 4604         | 4069              |         |
|       | <i>SOCS1</i>   | UTR3     | 0.74         |      | undetectable | undetectable | undetectable      |         |
|       | <i>SOCS1</i>   | P.H87FS  | 0.6          |      | undetectable | undetectable | undetectable      |         |
|       | <i>XPO1</i>    | P.E571K  | undetectable |      | 0.57         | 4769         | 2433              |         |
| UPN13 | <i>B2M</i>     | P.M1T    | 1.43         | 5.8  | 7.7          | 3704         | 4237              | 251.52  |
|       | <i>SOCS1</i>   | P.S29FS  | 3.4          |      | 4.6          | 2347         | 4129              |         |
|       | <i>SOCS1</i>   | P.V199A  | 1.51         |      | 2.61         | 5443         | 6438              |         |
|       | <i>SOCS1</i>   | P.H136L  | 0.69         |      | 1.28         | 9971         | 8716              |         |
| UPN14 | <i>SOCS1</i>   | P.Y64X   | 1.68         | 10.6 | 4.5          | 491          | 1187              | 2684.93 |
|       | <i>SOCS1</i>   | P.F58L   | undetectable |      | 2.4          | 702          | 2355              |         |
|       | <i>SOCS1</i>   | p.H54D   | undetectable |      | 2.08         | 864          | 2807              |         |
| UPN15 | no variant     |          | no variant   | 11.4 | no variant   | no variant   | no variant        | 0       |
| UPN16 | <i>B2M</i>     | P.Y98N   | 1.63         | 9.6  | 2.5          | 3388         | 3461              | 135.81  |
|       | <i>SOCS1</i>   | P.S106R  | 3.88         |      | 2.8          | 3592         | 3214              |         |
|       | <i>B2M</i>     | P.L15FS  | 1.98         |      | 1.9          | 2857         | 2329              |         |

|       |                         |                   |                 |      |                 |              |                |        |
|-------|-------------------------|-------------------|-----------------|------|-----------------|--------------|----------------|--------|
|       | <i>TNFAIP3</i>          | P.G482FS          | 1.71            |      | 1.1             | 8334         | 6403           |        |
|       | <i>SOCS1</i>            | P.Q131E           | 1.89            |      | 2.64            | 9806         | 7334           |        |
|       | <i>SOCS1</i>            | UTR5              | 1.77            |      | 1.76            | 4832         | 4010           |        |
| UPN17 | <i>ITPKB</i>            | P.K232FS          | 2.6             | 18.9 | 10.6            | 4221         | 5043           | 830.87 |
| UPN18 | <i>STAT6</i>            | P.N417Y           | 1               | 12.6 | undetectable    | undetectable | undetectable   | 9.67   |
|       | <i>SOCS1</i>            | P.T100I           | 0.81            |      | undetectable    | undetectable | undetectable   |        |
|       | <i>SOCS1</i>            | P.M1I             | 0.9             |      | undetectable    | undetectable | undetectable   |        |
|       | <i>GNA13</i>            | P.Q27X            | 0.7             |      | undetectable    | undetectable | undetectable   |        |
|       | <i>SOCS1</i>            | P.P165S           | undetectable    |      | 0.93            | 3563         | 4988           |        |
| UPN19 | no variant              |                   | no variant      | 11   | no variant      | no variant   | no variant     | 0      |
| UPN20 | <i>SOCS1</i>            | P.Q108H           | 2.02            | 11.5 | 4.5             | 1716         | 2043           | 210.02 |
|       | <i>SOCS1</i>            | P.A120P           | 0.58            |      | 4.25            | 2305         | 2921           |        |
|       | <i>SOCS1</i>            | P.L93FS           | 1.05            |      | 1.8             | 3769         | 4356           |        |
|       | <del><i>SOCS1</i></del> | <del>P.L12Q</del> | <del>1.03</del> |      | <del>0.87</del> | -            | -              |        |
|       | <i>SOCS1</i>            | P.E91G            | 1.06            |      | 2.02            | 3662         | 4365           |        |
|       | <i>SOCS1</i>            | P.I67FS           | undetectable    |      | 0.83            | 2056         | 2344           |        |
|       | <i>TNFAIP3</i>          | P.S592FS          | undetectable    |      | 4.9             | 4945         | 7336           |        |
|       | <i>XPO1</i>             | P.E571K           | undetectable    |      | 3.3             | 3918         | 2973           |        |
|       | <i>ITPKB</i>            | P.408_411DEL      | undetectable    |      | 5.13            | 7699         | 7786           |        |
|       | <i>B2M</i>              | P.L12Q            | 1.03            |      | 0.87            | 3234         | 4029           |        |
| UPN21 | <i>TNFAIP3</i>          | p.R162fs          | undetectable    | 12.6 | 1.77            | 1300         | dead before C2 | 271.4  |
| UPN22 | <i>STAT6</i>            | P.D419Y           | undetectable    | 16.6 | 2.28            | 4500         | 3940           | 89.61  |
|       | <i>TNFAIP3</i>          | P.R87X            | undetectable    |      | 0.86            | 6628         | 6637           |        |
|       | <i>SOCS1</i>            | UTR5              | 0.52            |      | 0.88            | 5138         | 4625           |        |
|       | <i>SOCS1</i>            | UTR5              | 0.52            |      | 0.95            | 5073         | 4609           |        |
| UPN23 | <i>NFKBIE</i>           | P.Y254FS          | undetectable    | 11.9 | 2.6             | 4094         | 3758           | 244.86 |
|       | <i>STAT6</i>            | P.N417S           | undetectable    |      | 3               | 4421         | 3728           |        |
|       | <i>SOCS1</i>            | P.E91G            | undetectable    |      | 6.2             | 3594         | 2794           |        |
|       | <i>SOCS1</i>            | P.A132FS          | undetectable    |      | 3.7             | 8830         | 7532           |        |
|       | <i>TNFAIP3</i>          | P.L324FS          | 0.59            |      | 1.2             | 4112         | 2736           |        |

|       |            |              |              |      |              |              |              |        |
|-------|------------|--------------|--------------|------|--------------|--------------|--------------|--------|
|       | SOCS1      | P.G139D      | undetectable |      | 0.74         | 9000         | 7527         |        |
| UPN24 | B2M        | P.D73N       | undetectable | 17   | 0.53         | 3764         | 3369         | 38.21  |
|       | ITPKB      | P.A70Q       | undetectable |      | 0.77         | 2349         | 5242         |        |
| UPN25 | STAT6      | P.D419Y      | 1.37         | 18.4 | 9.4          | 4327         | 4831         | 703.18 |
|       | STAT6      | P.N417Y      | 0.86         |      | 8.7          | 4337         | 4835         |        |
|       | TNFAIP3    | SPLICING     | 1.43         |      | 3.4          | 1842         | 1505         |        |
|       | ITPKB      | P.V192I      | 0.74         |      | 4            | 5718         | 6027         |        |
| UPN26 | SOCS1      | P.138_143DEL | undetectable | 17   | 1.38         | 9927         | 9168         | 122.95 |
| UPN27 | B2M        | P.L7X        | 5.5          | 17.5 | 1.3          | 4224         | 2430         | 246.11 |
|       | STAT6      | P.D419G      | 7.9          |      | 2.5          | 4878         | 2770         |        |
|       | XPO1       | P.E571K      | 25.6         |      | 10.5         | 4565         | 1919         |        |
|       | ITPKB      | P.G511D      | 7.1          |      | 2.2          | 8206         | 5855         |        |
|       | SOCS1      | P.N5FS       | 3.02         |      | 1.17         | 3895         | 3018         |        |
|       | SOCS1      | P.G122FS     | 6.7          |      | 1.1          | 9829         | 6930         |        |
|       | TNFAIP3    | P.K417FS     | 7.44         |      | 0.7          | 5290         | 4741         |        |
| UPN28 | B2M        | UTR5         | undetectable | 15.4 | 0.78         | 3314         | 2496         | 51.53  |
| UPN29 | no variant |              | no variant   | 15.4 | no variant   | no variant   | no variant   | 0      |
| UPN30 | STAT6      | P.N417Y      | 0.82         | 10   | undetectable | undetectable | undetectable | 13.55  |
|       | STAT6      | P.D419N      | 0.82         |      | undetectable | undetectable | undetectable |        |
|       | B2M        | P.A8FS       | 1.3          |      | undetectable | undetectable | undetectable |        |
|       | SOCS1      | P.R159FS     | 0.61         |      | undetectable | undetectable | undetectable |        |
| UPN31 | TNFAIP3    | SPLICING     | NA           | NA   | 0.6          | 7682         | 3991         | 525.16 |
|       | XPO1       | P.E571K      |              |      | 4.4          | 3463         | 1657         |        |
|       | GNA13      | P.D222N      |              |      | 4.1          | 3087         | 1255         |        |
|       | GNA13      | P.M375K      |              |      | 2.7          | 9709         | 4296         |        |
|       | B2M        | P.R3FS       |              |      | 3.5          | 4060         | 1770         |        |
|       | ITPKB      | P.R132P      |              |      | 4.8          | 6930         | 4459         |        |
|       | SOCS1      | P.T185FS     |              |      | 0.82         | 4010         | 2511         |        |
| UPN32 | NA         | NA           | NA           | NA   | no variant   | no variant   | no variant   | 0      |
| UPN33 | TNFAIP3    | P.L303X      | NA           | NA   | 2.91         | 7149         | 5244         | 359.41 |



|       |                |                      |    |    |            |            |                                |         |
|-------|----------------|----------------------|----|----|------------|------------|--------------------------------|---------|
| UPN34 | <i>GNA13</i>   | SPLICING             | NA | NA | 7.81       | 627        | 1633                           | 2473.11 |
|       | <i>SOCS1</i>   | P.A3P                |    |    | 4.34       | 1499       | 2816                           |         |
|       | <i>B2M</i>     | P.Y86X               |    |    | 10.84      | 1302       | 2584                           |         |
|       | <i>B2M</i>     | P.L84FS              |    |    | 12.14      | 1302       | 2585                           |         |
|       | <i>B2M</i>     | P.W80DEL             |    |    | 12.16      | 1301       | 2581                           |         |
|       | <i>STAT6</i>   | P.D419G              |    |    | 6.95       | 2212       | 3277                           |         |
|       | <i>NFKBIE</i>  | P.Y254FS             |    |    | 4.18       | 2442       | 3793                           |         |
| UPN35 | <i>STAT6</i>   | P.G416V              | NA | NA | 3.51       | 4903       | 3730                           | 472.03  |
|       | <i>STAT6</i>   | P.N417Y              |    |    | 3.96       | 4903       | 3723                           |         |
|       | <i>ITPKB</i>   | P.R286FS             |    |    | 2.1        | 6151       | 4196                           |         |
|       | <i>SOCS1</i>   | P.S109X              |    |    | 0.56       | 4271       | 2512                           |         |
| UPN36 | NA             | NA                   | NA | NA | no variant | no variant | no variant                     | 0       |
| UPN37 | <i>B2M</i>     | P.V9E                | NA | NA | 1.89       | 4030       | 3211                           | 109.72  |
|       | <i>TNFAIP3</i> | NA                   |    |    | 0.69       | 3910       | 2776                           |         |
|       | <i>NFKBIE</i>  | P.Y254FS             |    |    | 1.14       | 5112       | 3367                           |         |
| UPN38 | <i>PTPN1</i>   | SPLICING             | NA | NA | 7.91       | 4552       | 4331                           | 1434.85 |
|       | <i>SOCS1</i>   | P.F58L               | NA |    | 3.83       | 940        | 1505                           |         |
|       | <i>SOCS1</i>   | P.Q131E              | NA |    | 6.36       | 6147       | 6410                           |         |
|       | <i>SOCS1</i>   | P.G133V              | NA |    | 6.4        | 6141       | 6387                           |         |
|       | <i>SOCS1</i>   | P.P198F              | NA |    | 4.02       | 4830       | 4958                           |         |
|       | <i>SOCS1</i>   | P.L204V              | NA |    | 3.85       | 4842       | 4973                           |         |
|       | <i>SOCS1</i>   | P.207_210DELINSLEUGL | NA |    | 4.1        | 4836       | 4974                           |         |
|       | <i>SOCS1</i>   | UTR3                 | NA |    | 3.98       | 4850       | 4964                           |         |
|       | <i>B2M</i>     | P.L7X                | NA |    | 2.27       | 1632       | 1789                           |         |
|       | <i>NFKBIE</i>  | P.Y254FS             | NA |    | 3.17       | 2125       | 3071                           |         |
| UPN39 | NA             | NA                   | NA | NA | no variant | no variant | no variant                     | 0       |
| UPN40 | NA             | NA                   | NA | NA | no variant | no variant | no variant                     | 0       |
| UPN41 | NA             | NA                   | NA | NA | no variant | no variant | no variant                     | 0       |
| UPN42 | <i>SOCS1</i>   | P.Q6X                | NA | NA | 1.99       | 3088       | 3552                           | 1592    |
| UPN43 | NA             | NA                   | NA | NA | no variant | no variant | blood collection not performed | 0       |

|       |         |            |    |    |            |            |                                |        |
|-------|---------|------------|----|----|------------|------------|--------------------------------|--------|
| UPN44 | SOCS1   | P.S143FS   | NA | NA | 0.71       | 10071      | 8299                           | 165.26 |
|       | TNFAIP3 | SPLICING   |    |    | 1.57       | 5726       | 6286                           |        |
|       | ITPKB   | P.A241P    |    |    | 1.91       | 7318       | 5385                           |        |
|       | SOCS1   | P.S116N    |    |    | 0.87       | 5504       | 4379                           |        |
|       | B2M     | P.E97X     |    |    | 0.61       | 6724       | 5100                           |        |
|       | GNA13   | P.E26FS    |    |    | 0.74       | 673        | 708                            |        |
| UPN45 | TNFAIP3 | P.C57FS    | NA | NA | 6.57       | 4561       | 5526                           | 181.3  |
|       | GNA13   | P.H118Y    |    |    | 0.63       | 3012       | 3740                           |        |
|       | PTPN1   | P.L294F    |    |    | 0.51       | 6941       | 5054                           |        |
|       | PTPN1   | P.R428K    |    |    | 0.54       | 4000       | 2692                           |        |
| UPN46 | NA      | NA         | NA | NA | no variant | no variant | no variant                     | 0      |
| UPN47 | TNFAIP3 | P.T161FS   | NA | NA | 0.9        | 1558       | 3415                           | 44.81  |
|       | ITPKB   | P.M14I     |    |    | 0.58       | 2080       | 1789                           |        |
|       | SOCS1   | P.V2E      |    |    | 0.74       | 4992       | 4664                           |        |
|       | GNA13   | P.R260X    |    |    | 0.75       | 5462       | 7065                           |        |
| UPN48 | GNA13   | SPLICING   | NA | NA | 4.51       | 4549       | 4380                           | 130.75 |
|       | SOCS1   | P.87_90DEL |    |    | 1.83       | 5086       | 3758                           |        |
|       | B2M     | SPLICING   |    |    | 0.54       | 4839       | 4788                           |        |
|       | SOCS1   | P.R109W    |    |    | 2.45       | 3101       | 2069                           |        |
| UPN49 | NA      | NA         | NA | NA | no variant | no variant | no variant                     | 0      |
| UPN50 | NA      | NA         | NA | NA | no variant | no variant | no variant                     | 0      |
| UPN51 | NA      | NA         | NA | NA | no variant | no variant | no variant                     | 0      |
| UPN52 | PTPN1   | P.L294F    | NA | NA | 0.66       | 5169       | 5473                           | 30.17  |
| UPN53 | NA      | NA         | NA | NA | no variant | no variant | no variant                     | 0      |
| UPN54 | SOCS1   | UTR3       | NA | NA | 2.16       | 6410       | blood collection not performed | 261.22 |
|       | SOCS1   | P.F79L     |    |    | 0.53       | 1133       | blood collection not performed |        |
| UPN55 | NA      | NA         | NA | NA | no variant | no variant | no variant                     | 0      |
| UPN56 | STAT6   | P.D419G    | NA | NA | 6.1        | 8070       | 6401                           | 158.14 |
|       | STAT6   | P.N417D    |    |    | 6          | 8079       | 6398                           |        |
|       | B2M     | P.M1K      |    |    | 3          | 2295       | 3182                           |        |

|       |                |              |    |    |            |            |                |        |
|-------|----------------|--------------|----|----|------------|------------|----------------|--------|
|       | <i>TNFAIP3</i> | P.D134FS     |    |    | 2.3        | 5168       | 4644           |        |
|       | <i>SOCS1</i>   | P.H129FS     |    |    | 2.3        | 10619      | 9624           |        |
|       | <i>SOCS1</i>   | P.125_129DEL |    |    | 1.21       | 10529      | 9661           |        |
|       | <i>SOCS1</i>   | P.F58L       |    |    | 1.45       | 3150       | 2785           |        |
|       | B2M            | P.L12P       |    |    | 1.68       | 4362       | 3191           |        |
| UPN57 | STAT6          | P.G416R      | NA | NA | 0.79       | 5043       | 8454           | 47.02  |
|       | <i>SOCS1</i>   | P.D63Y       |    |    | 1.14       | 968        | 2101           |        |
| UPN58 | <i>SOCS1</i>   | P.N110FS     | NA | NA | 5.4        | 3481       | dead before C2 | 683.26 |
|       | <i>SOCS1</i>   | P.R103FS     |    |    | 5.3        | 4734       | dead before C2 |        |
|       | <i>SOCS1</i>   | P.M1I        |    |    | 1.2        | 4240       | dead before C2 |        |
| UPN59 | <i>SOCS1</i>   | P.S116R      | NA | NA | 2.7        | 4451       | 3532           | 747.41 |
| UPN60 | NA             | NA           | NA | NA | no variant | no variant | no variant     | 0      |

**Supplementary Table 3:** Comparison between the ctDNA results of our classical Hodgkin Lymphoma (cHL) cohort and data from the study by Spina et al. <sup>6</sup>

|                                                     | Our study                                                 |        | Spina et al. <i>Blood</i> 2018                                              |      |                                |        |                                          |        |
|-----------------------------------------------------|-----------------------------------------------------------|--------|-----------------------------------------------------------------------------|------|--------------------------------|--------|------------------------------------------|--------|
| number of patients                                  | 60 untreated patients                                     |        | First cohort : 15 patients with biopsy / plasma ctDNA comparison            |      |                                |        |                                          |        |
|                                                     |                                                           |        | second cohort : 80 untreated patients and 32 refractory / relapsed patients |      |                                |        |                                          |        |
| Samples                                             | genomic DNA (FFPE biopsy) and plasma ctDNA                |        | genomic DNA from microdissected HRS cells and plasma ctDNA                  |      |                                |        |                                          |        |
| NGS methods                                         | PGM® : ampliseq                                           |        | Illumina® : CAPP-seq                                                        |      |                                |        |                                          |        |
| Genes panel                                         | coding sequence and splice sites (or hotspots) of 9 genes |        | coding exons and splice sites (or hotspots) of 77 genes                     |      |                                |        |                                          |        |
|                                                     | ctDNA of 60 untreated patients                            |        | ctDNA of 15 untreated patients                                              |      | ctDNA of 80 untreated patients |        | ctDNA of 32 relapsed/refractory patients |        |
| Number of mutated patients by gene in ctDNA samples | n =                                                       | (%)    | n =                                                                         | (%)  | n =                            | (%)    | n =                                      | (%)    |
| <i>XPO1</i>                                         | 6                                                         | (10)   | 1                                                                           | (7)  | 9                              | (11.2) | 4                                        | (12.5) |
| <i>GNA13</i>                                        | 8                                                         | (13.3) | 4                                                                           | (27) | 15                             | (18.7) | 9                                        | (28.1) |
| <i>SOCS1</i>                                        | 31                                                        | (51.7) | ND                                                                          | ND   | ND                             | ND     | ND                                       | ND     |
| <i>ITPKB</i>                                        | 14                                                        | (23.3) | 8                                                                           | (53) | 22                             | (27.5) | 6                                        | (18.8) |
| <i>B2M</i>                                          | 20                                                        | (33.3) | 4                                                                           | (27) | 13                             | (16.2) | 4                                        | (12.5) |
| <i>STAT6</i>                                        | 14                                                        | (23.3) | 12                                                                          | (80) | 30                             | (37.5) | 9                                        | (28.1) |
| <i>NFKBIE</i>                                       | 8                                                         | (13.3) | 1                                                                           | (7)  | 5                              | (6.2)  | 3                                        | (9.4)  |
| <i>PTPN1</i>                                        | 3                                                         | (5)    | ND                                                                          | ND   | ND                             | ND     | ND                                       | ND     |
| <i>TNFAIP3</i>                                      | 19                                                        | (31.7) | 8                                                                           | (53) | 28                             | (35)   | 8                                        | (25)   |

Abbreviations : NGS : next generation sequencing ; ctDNA : circulating tumor DNA ; FFPE : formalin fixed paraffin embedded ; HRS cells : Hodgkin and Reed-Sternberg cells ; ND : not done

**Supplementary Table 4: Correlations between the mutational profile at diagnosis and the clinico-biological characteristics of patients**

| Somatic mutations at diagnosis | ITPKB        |              |       | SOCS1      |            |       | TNFAIP3    |            |       | XPO1         |            |       | STAT6        |              |      | NFKBIE     |            |       | B2M          |              |       |
|--------------------------------|--------------|--------------|-------|------------|------------|-------|------------|------------|-------|--------------|------------|-------|--------------|--------------|------|------------|------------|-------|--------------|--------------|-------|
|                                | mutated      | unmutated    | p     | mutated    | unmutated  | p     | mutated    | unmutated  | p     | mutated      | unmutated  | p     | mutated      | unmutated    | p    | mutated    | unmutated  | p     | mutated      | unmutated    | p     |
| Sex                            |              |              |       |            |            |       |            |            |       |              |            |       |              |              |      |            |            |       |              |              |       |
| Female                         | 9 (64.3%)    | 19 (41.3%)   | 0.23  | 14 (45.2%) | 14 (48.3%) | 1     | 11 (57.9%) | 17 (41.5%) | 0.36  | 6 (100%)     | 22 (40.7%) | 0.007 | 7 (50%)      | 21 (45.7%)   | 1    | 5 (62.5%)  | 23 (44.2%) | 0.45  | 12 (60%)     | 16 (40%)     | 0.23  |
| Male                           | 5 (35.7%)    | 27 (58.7%)   |       | 17 (54.8%) | 15 (51.7%) |       | 8 (42.1%)  | 24 (58.5%) |       | 0 (0%)       | 32 (59.3%) |       | 7 (50%)      | 25 (54.3%)   |      | 3 (37.5%)  | 29 (55.8%) |       | 8 (40%)      | 24 (60%)     |       |
| median age (range) [years]     | 32.5 [20-60] | 34.5 [21-86] | 0.44  | 33 [20-86] | 48 [21-81] | 0.2   | 34 [20-80] | 32 [21-86] | 0.95  | 30.5 [20-39] | 34 [21-86] | 0.39  | 30.5 [21-48] | 35.5 [20-86] | 0.11 | 28 [23-38] | 34 [20-86] | 0.092 | 30.5 [20-60] | 37.5 [21-86] | 0.14  |
| Bulky disease (>=10 cm)        |              |              |       |            |            |       |            |            |       |              |            |       |              |              |      |            |            |       |              |              |       |
| Yes                            | 2 (14.3%)    | 7 (15.2%)    | 1     | 7 (22.6%)  | 2 (6.9%)   | 0.15  | 3 (15.8%)  | 6 (14.6%)  | 1     | 1 (16.7%)    | 8 (14.8%)  | 1     | 1 (7.1%)     | 8 (17.4%)    | 0.67 | 2 (25%)    | 7 (13.5%)  | 0.59  | 5 (25%)      | 4 (10%)      | 0.14  |
| No                             | 12 (85.7%)   | 39 (84.8%)   |       | 24 (77.4%) | 27 (93.1%) |       | 16 (84.2%) | 35 (85.4%) |       | 5 (83.3%)    | 46 (85.2%) |       | 13 (92.9%)   | 38 (82.6%)   |      | 6 (75%)    | 45 (86.5%) |       | 15 (75%)     | 36 (90%)     |       |
| Ann Arbor stage                |              |              |       |            |            |       |            |            |       |              |            |       |              |              |      |            |            |       |              |              |       |
| Stage I-II                     | 7 (50%)      | 24 (52.2%)   | 1     | 11 (35.5%) | 20 (69%)   | 0.02  | 7 (36.8%)  | 24 (58.5%) | 0.2   | 2 (33.3%)    | 29 (53.7%) | 0.42  | 5 (35.7%)    | 26 (56.5%)   | 0.29 | 5 (62.5%)  | 26 (50%)   | 0.71  | 10 (50%)     | 21 (52.5%)   | 1     |
| Stage III-IV                   | 7 (50%)      | 22 (47.8%)   |       | 20 (64.5%) | 9 (31%)    |       | 12 (63.2%) | 17 (41.5%) |       | 4 (66.7%)    | 25 (46.3%) |       | 9 (64.3%)    | 20 (43.5%)   |      | 3 (37.5%)  | 26 (50%)   |       | 10 (50%)     | 19 (47.5%)   |       |
| Number of involved nodal areas |              |              |       |            |            |       |            |            |       |              |            |       |              |              |      |            |            |       |              |              |       |
| ≥4                             | 7 (50%)      | 8 (17.4%)    | 0.034 | 11 (35.5%) | 4 (13.8%)  | 0.075 | 8 (42.1%)  | 7 (17.1%)  | 0.078 | 3 (50%)      | 12 (22.2%) | 0.16  | 4 (28.6%)    | 11 (23.9%)   | 0.73 | 4 (50%)    | 11 (21.2%) | 0.098 | 9 (45%)      | 6 (15%)      | 0.027 |
| <4                             | 7 (50%)      | 38 (82.6%)   |       | 20 (64.5%) | 25 (86.2%) |       | 11 (57.9%) | 34 (82.9%) |       | 3 (50%)      | 42 (77.8%) |       | 10 (71.4%)   | 35 (76.1%)   |      | 4 (50%)    | 41 (78.8%) |       | 11 (55%)     | 34 (85%)     |       |
| B symptoms                     |              |              |       |            |            |       |            |            |       |              |            |       |              |              |      |            |            |       |              |              |       |
| Yes                            | 10 (71.4%)   | 23 (50%)     | 0.22  | 18 (58.1%) | 15 (51.7%) | 0.82  | 13 (68.4%) | 20 (48.8%) | 0.25  | 4 (66.7%)    | 29 (53.7%) | 0.68  | 9 (64.3%)    | 24 (52.2%)   | 0.62 | 4 (50%)    | 29 (55.8%) | 1     | 11 (55%)     | 22 (55%)     | 1     |
| No                             | 4 (28.6%)    | 23 (50%)     |       | 13 (41.9%) | 14 (48.3%) |       | 6 (31.6%)  | 21 (51.2%) |       | 2 (33.3%)    | 25 (46.3%) |       | 5 (35.7%)    | 22 (47.8%)   |      | 4 (50%)    | 23 (44.2%) |       | 9 (45%)      | 18 (45%)     |       |
| IPS (Hasenclever)              |              |              |       |            |            |       |            |            |       |              |            |       |              |              |      |            |            |       |              |              |       |
| 0-2                            | 8 (57.1%)    | 31 (67.4%)   | 0.7   | 17 (54.8%) | 22 (75.9%) | 0.15  | 11 (57.9%) | 28 (68.3%) | 0.62  | 3 (50%)      | 36 (66.7%) | 0.65  | 9 (64.3%)    | 30 (65.2%)   | 1    | 8 (100%)   | 31 (59.6%) | 0.042 | 12 (60%)     | 27 (67.5%)   | 0.77  |
| 3-5                            | 6 (42.9%)    | 15 (32.6%)   |       | 14 (45.2%) | 7 (24.1%)  |       | 8 (42.1%)  | 13 (31.7%) |       | 3 (50%)      | 18 (33.3%) |       | 5 (35.7%)    | 16 (34.8%)   |      | 0 (0%)     | 21 (40.4%) |       | 8 (40%)      | 13 (32.5%)   |       |
| Histologic subtype             |              |              |       |            |            |       |            |            |       |              |            |       |              |              |      |            |            |       |              |              |       |
| Sclero-nodular subtype         | 11 (78.6%)   | 31 (67.4%)   | 0.52  | 25 (80.6%) | 17 (58.6%) | 0.11  | 16 (84.2%) | 26 (63.4%) | 0.14  | 5 (83.3%)    | 37 (68.5%) | 0.66  | 12 (85.7%)   | 30 (65.2%)   | 0.19 | 8 (100%)   | 34 (65.4%) | 0.091 | 16 (80%)     | 26 (65%)     | 0.37  |
| other subtypes                 | 3 (21.4%)    | 15 (32.6%)   |       | 6 (19.4%)  | 12 (41.4%) |       | 3 (15.8%)  | 15 (36.6%) |       | 1 (16.7%)    | 17 (31.5%) |       | 2 (14.3%)    | 16 (34.8%)   |      | 0 (0%)     | 18 (34.5%) |       | 4 (20%)      | 14 (35%)     |       |

abbreviations: BMI = body mass index; IPI : international prognostic index; NA : not available; aaIPI = age adjusted IPI; cHL : classical Hodgkin lymphoma

**Supplementary Figure 1** : Progression-free survival (PFS) of the global cohort of patients.

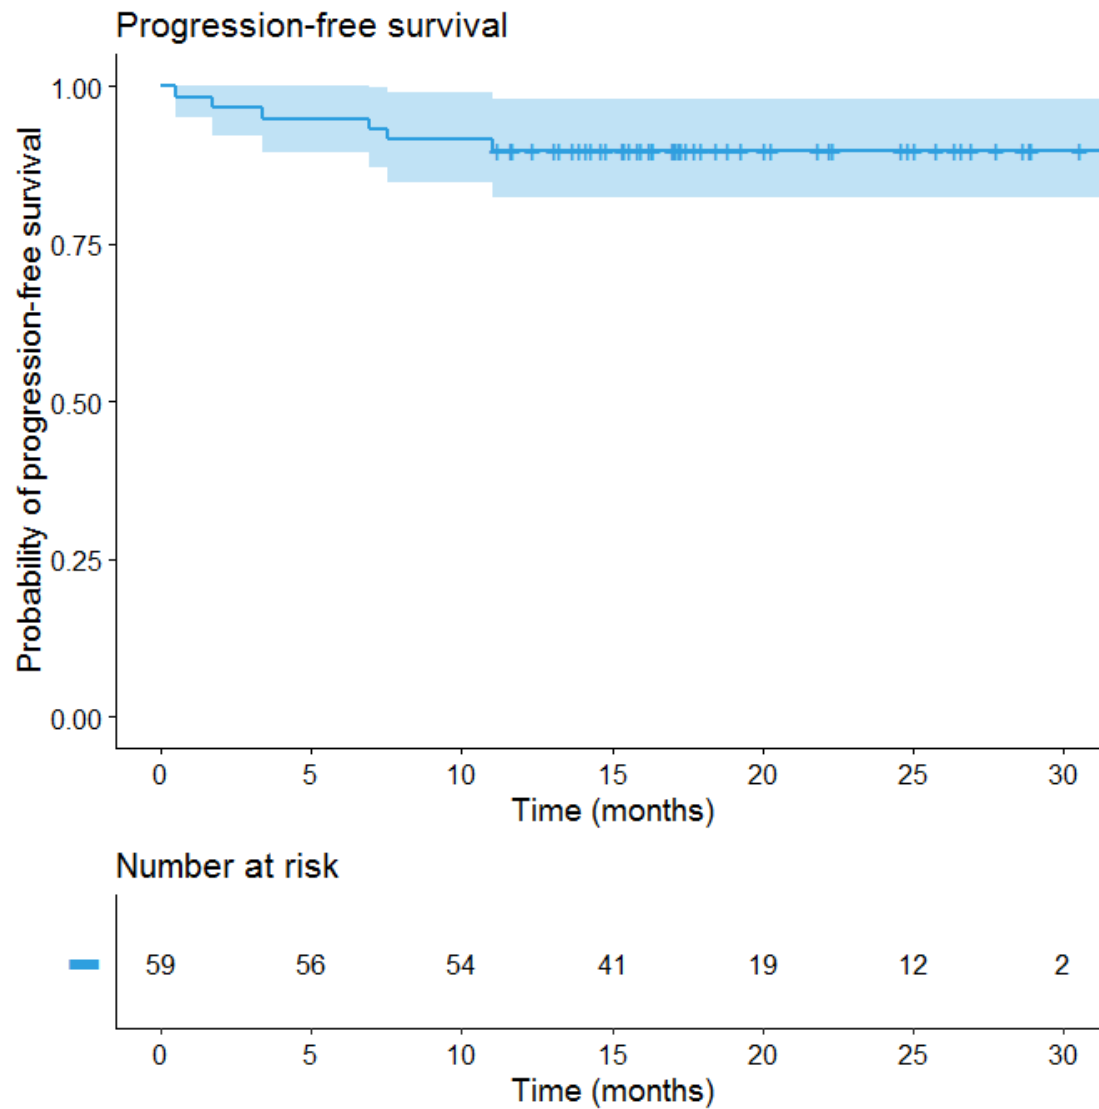

**Supplementary Figure 2 :** Overall survival (OS) of the global cohort of patients.

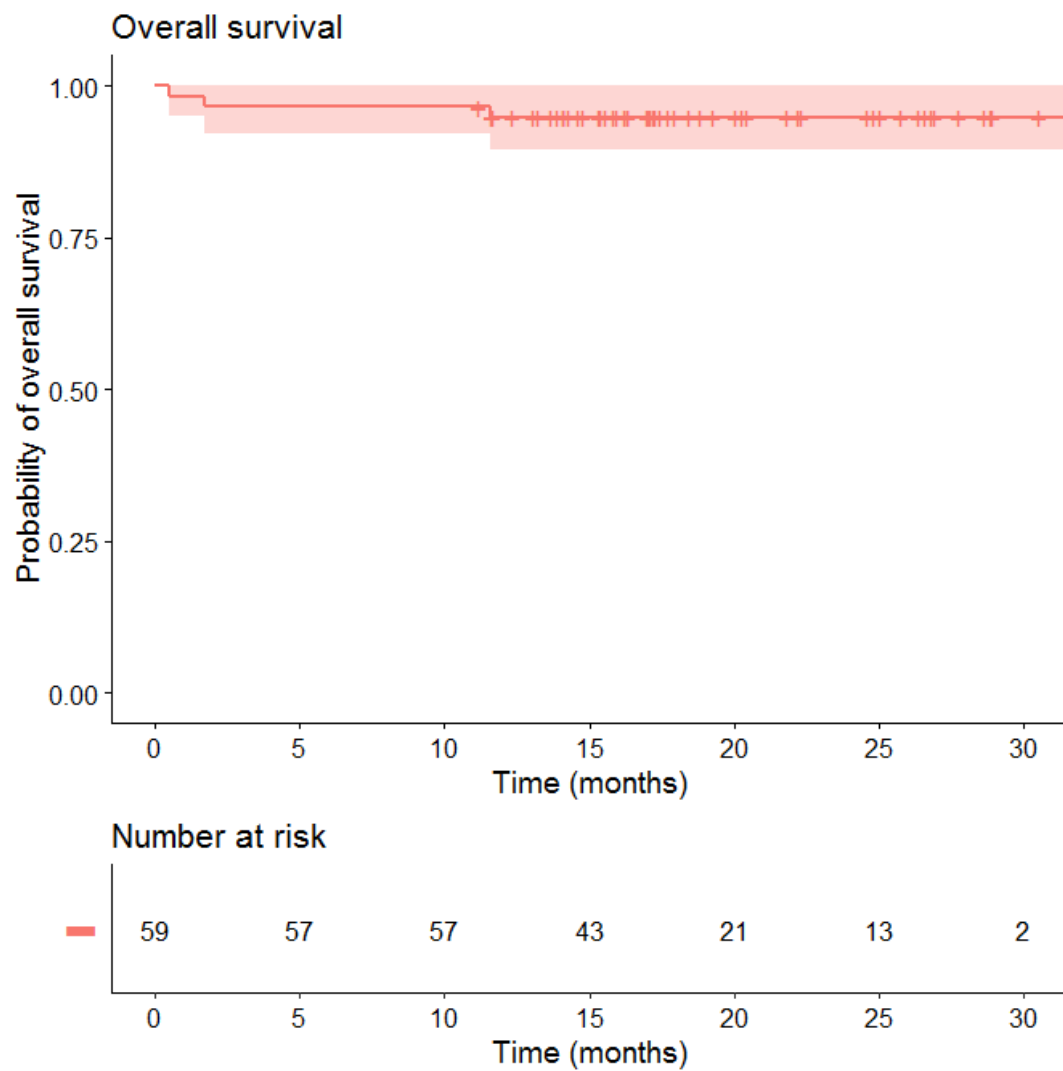

Supplement: 2019_237719_CAMUS_SUPPL.pdf [file 2019_237719_CAMUS_SUPPL.pdf]
